# Supplementary material
Source: publisher figshare collection journal article supplement (https://acs.figshare.com/ndownloader/files/4491103)
Supplement: Supplementary file 1 [file 4491103]

## Supporting information

### **Pt-decorated PdFe Nanoparticles as Methanol Tolerant Oxygen Reduction Electrocatalyst**

Jinhua Yang,<sup>†</sup> Weijiang Zhou,<sup>†,||</sup> Chin Hsien Cheng,<sup>†</sup> Jim Yang Lee,<sup>\*,†,‡</sup>  
and Zhaolin Liu<sup>‡</sup>

<sup>†</sup> *Department of Chemical and Biomolecular Engineering, National University of  
Singapore, 10 Kent Ridge Crescent, Singapore 119260*

*Tel: 65 6516 2899; Fax: 65 6779 1936.*

*Email: [cheleejy@nus.edu.sg](mailto:cheleejy@nus.edu.sg)*

<sup>‡</sup> *Institute of Materials Research and Engineering, 3 Research Link, Singapore 117602*

<sup>||</sup> *Current address: Engineering School, Temasek Polytechnic, 21 Tampines Avenue 1,  
Singapore 529757*

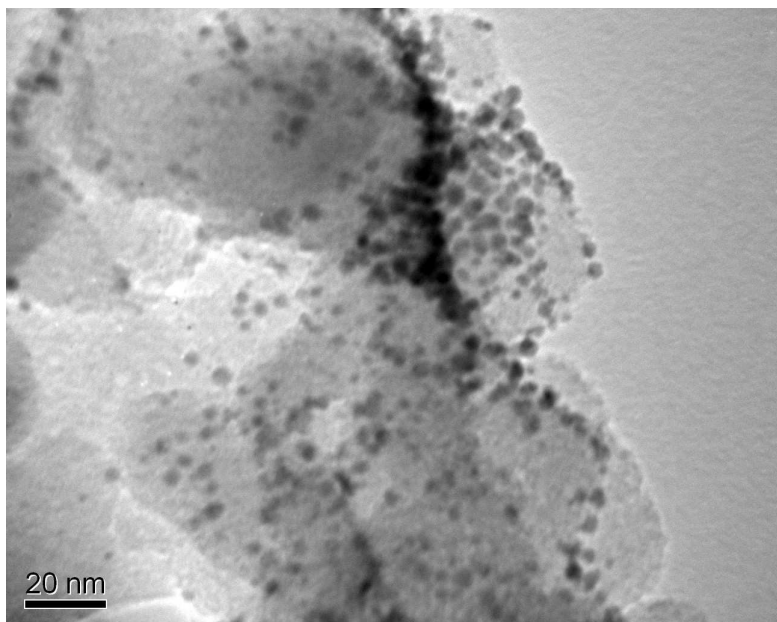

**Figure S1.** TEM image of commercial Pt/C

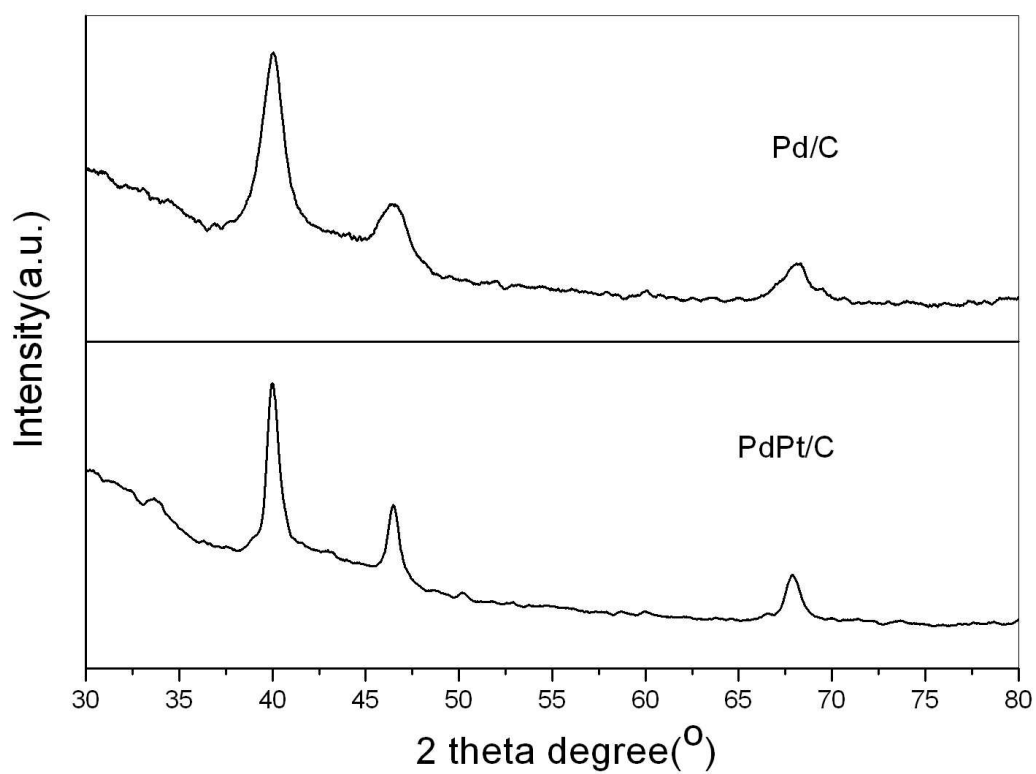

**Figure S2.** XRD patterns of Pd/C and Pd<sub>70</sub>Pt<sub>30</sub>/C. (where Pd/C is from E-Tek, Pd<sub>70</sub>Pt<sub>30</sub>/C was synthesized from Pd/C and H<sub>2</sub>PtCl<sub>6</sub> by a method similar to the preparation of PdFe/C)

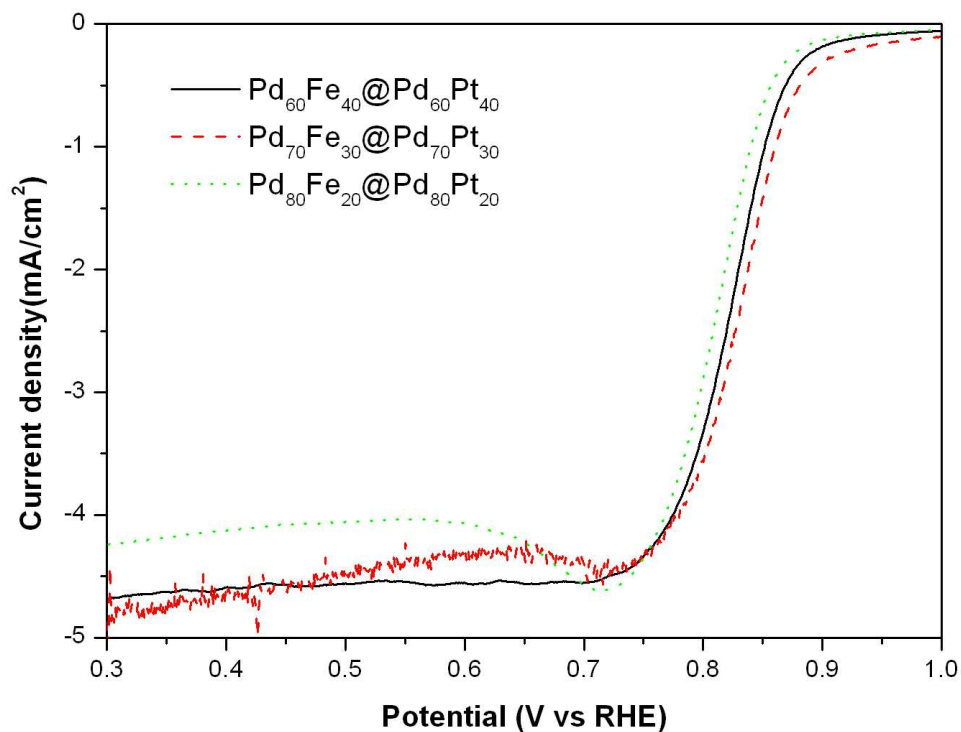

**Figure S3.** Linear voltammograms of  $\text{Pd}_{60}\text{Fe}_{40}@\text{Pd}_{60}\text{Pt}_{40}/\text{C}$ ,  $\text{Pd}_{70}\text{Fe}_{30}@\text{Pd}_{70}\text{Pt}_{30}/\text{C}$  ( $\text{PdFe}@\text{PdPt}$ ) and  $\text{Pd}_{80}\text{Fe}_{20}@\text{Pd}_{80}\text{Pt}_{20}/\text{C}$  in oxygen-saturated 0.1 M  $\text{HClO}_4$  in negative-going scans. Sweep rate:  $20 \text{ mV s}^{-1}$ ; room temperature; 1600 rpm. ( $\text{Pd}_x\text{Fe}_y@\text{Pd}_x\text{Pt}_y/\text{C}$  were prepared by Pt the galvanic replacement reaction on  $\text{Pd}_x\text{Fe}_y$ )
